# Supplementary material
Source: publisher figshare collection journal article supplement (https://karger.figshare.com/ndownloader/files/14948462)
Supplement: Supplementary file 1 [file 14948462]

**Supplementary Table 1.** Results for the ETDRS group 10-20. The ↓↓ (↑↑) correspond to the case when the values of the metrics were lower (higher) when compared to the mean value of the healthy control population minus (plus) two SD. The ↓ (↑) correspond to the value of the metric minus (plus) more than one SD when compared to the mean value of the healthy control population. The ↓ (↑) corresponds to the case when the value is lower (higher) when compared to the mean of the control population. For the full thickness values, the framed values correspond to cases with subclinical macular edema and bold values to central-involved macular edema.

|  |  |  |  |  |  |  |  |  | RNFL | | GCL+IPL | | INL | | OPL | | ONL+IS | | OS | | RPE | | RETINA | | |
| --- | --- | --- | --- | --- | --- | --- | --- | --- | --- | --- | --- | --- | --- | --- | --- | --- | --- | --- | --- | --- | --- | --- | --- | --- | --- |
| Id | Age [y] | Gender | ETDRS Level | HbA1C [%] | Visual Acuity [letters] | Diabetes Duration [y] | VD 3x3 SRP | VD 3x3 DRP | Thickness (CSF) | LOR (CSF) | Thickness (CSF) | LOR (CSF) | Thickness (CSF) | LOR (CSF) | Thickness (CSF) | LOR (CSF) | Thickness (CSF) | LOR (CSF) | Thickness (CSF) | LOR (CSF) | Thickness (CSF) | LOR (CSF) | Thickness (CSF) | LOR (CSF) | Thickness (CSF) [µm] |
| 1 | 78 | M | 20 | 8.3 | 80 | 14 | ↓ | ↓ | ↓ | ↓ | ↑ | ↓ | ↑ | ↓ | ↑ | ↑ | ↓ | ↓ | ↓↓ | ↓ | ↓ | ↓ | ↓ | ↓ | 257 |
| 2 | 76 | M | 10 | 7.2 | 80 | 17 | ↓ | ↑ | ↓ | ↑↑ | ↑↑ | ↑↑ | ↑↑ | ↑↑ | ↑ | ↑↑ | ↑ | ↑↑ | ↑ | ↑↑ | ↓ | ↑ | ↑↑ | ↑↑ | **306** |
| 3 | 74 | M | 10 | 7.2 | 85 | 10 | ↓↓ | ↓↓ | ↓ | ↑↑ | ↑↑ | ↑↑ | ↑↑ | ↑↑ | ↑ | ↑↑ | ↓ | ↑↑ | ↓ | ↑↑ | ↑ | ↑↑ | ↑ | ↑↑ | 284 |
| 4 | 62 | M | 14A | 7.8 | 85 | 15 | ↓ | ↓↓ | ↓ | ↑ | ↓ | ↑ | ↑ | ↑ | ↓ | ↑ | ↓ | ↑ | ↓ | ↓ | ↓ | ↑ | ↓ | ↑ | 228 |
| 5 | 78 | M | 15 | 6.9 | 80 | 10 | ↓↓ | ↓↓ | ↓ | ↓ | ↑ | ↑ | ↑ | ↑↑ | ↑ | ↑↑ | ↓↓ | ↑ | ↑ | ↓ | ↓ | ↓ | ↓ | ↑ | 239 |
| 6 | 65 | M | 15 | 4.8 | 90 | 16 | ↑ | ↓ | ↓ | ↑ | ↑ | ↓ | ↑↑ | ↓ | ↑ | ↓ | ↑ | ↓ | ↑ | ↓ | ↓ | ↓ | ↑↑ | ↓ | 300 |
| 7 | 73 | M | 12 | 6 | 80 | 8 | ↓↓ | ↓ | ↓ | ↑ | ↑ | ↑↑ | ↑↑ | ↑↑ | ↑ | ↑ | ↑ | ↑ | ↑ | ↑↑ | ↑ | ↑ | ↑ | ↑ | 289 |
| 8 | 70 | M | 10 | 7.3 | 70 | 11 | ↓ | ↓ | ↓↓ | ↓ | ↑ | ↑ | ↑ | ↑ | ↑ | ↑ | ↑ | ↑ | ↓ | ↑ | ↓ | ↓ | ↑ | ↑ | 268 |
| 9 | 75 | M | 10 | 7 | 83 | 20 | ↓ | ↓ | ↑ | ↑↑ | ↓ | ↑↑ | ↑ | ↑↑ | ↑ | ↑↑ | ↑ | ↑↑ | ↑ | ↑↑ | ↓ | ↑↑ | ↑ | ↑↑ | 280 |
| 10 | 76 | M | 20 | 5.8 | 83 | 21 | ↓ | ↓ | ↓ | ↓ | ↑ | ↓ | ↑ | ↑ | ↑↑ | ↑↑ | ↓ | ↓ | ↓ | ↓ | ↓ | ↑ | ↑ | ↓ | 265 |
| 11 | 76 | F | 10 | 6.4 | 75 | 16 | ↑ | ↓ | ↑ | ↓ | ↑ | ↓ | ↑ | ↓ | ↑ | ↑ | ↑↑ | ↑ | ↑ | ↑↑ | ↓ | ↑ | ↑ | ↑ | **297** |
| 12 | 72 | M | 15 | 6.5 | 65 | 29 | ↓ | ↓ | ↓ | ↓ | ↓ | ↑ | ↑ | ↑ | ↑ | ↑ | ↑ | ↑ | ↓↓ | ↓ | ↑ | ↓ | ↑ | ↑ | 268 |
| 13 | 70 | M | 20 | 7.3 | 66 | 27 | ↓ | ↓ | ↓ | ↑↑ | ↑ | ↑ | ↑ | ↑ | ↑ | ↑↑ | ↑ | ↑ | ↑ | ↑ | ↓ | ↓ | ↑ | ↑ | 271 |
| 14 | 69 | M | 20 | 6.8 | 80 | 18 | ↑ | ↑ | ↓ | ↓ | ↑ | ↓ | ↑ | ↓ | ↑ | ↓ | ↓ | ↓ | ↓ | ↓ | ↑ | ↓ | ↑ | ↓ | 281 |
| 15 | 61 | M | 20 | 7.7 | 90 | 10 | ↑ | ↑ | ↑ | ↓ | ↑ | ↓ | ↑↑ | ↓ | ↑ | ↓ | ↑ | ↓ | ↓ | ↓ | ↑ | ↓ | ↑ | ↓ | 288 |
| 16 | 69 | M | 10 | 6 | 85 | 24 | ↑ | ↓ | ↓ | ↓ | ↓ | ↓ | ↑↑ | ↓ | ↑ | ↑ | ↑ | ↓ | ↑↑ | ↑ | ↓ | ↓ | ↑ | ↓ | 281 |
| 17 | 65 | M | 10 | 6.4 | 88 | 41 | ↓ | ↓ | ↓ | ↑ | ↑ | ↑ | ↑↑ | ↑ | ↑↑ | ↑ | ↓ | ↑ | ↓ | ↑ | ↓ | ↑ | ↑ | ↑ | 280 |
| 18 | 67 | F | 20 | 6.1 | 85 | 7 | ↓ | ↓ | ↓ | ↑↑ | ↓↓ | ↑↑ | ↓ | ↑↑ | ↓ | ↑↑ | ↑ | ↑↑ | ↑ | ↑↑ | ↓ | ↑ | ↓ | ↑↑ | 226 |
| 19 | 65 | M | 10 | 6.5 | 90 | 13 | ↓ | ↓ | ↓ | ↓↓ | ↑ | ↓ | ↑ | ↓ | ↑ | ↑ | ↓ | ↓ | ↑ | ↓ | ↓ | ↓ | ↓ | ↓ | 257 |
| 20 | 64 | M | 10 | 5.6 | 79 | 15 | ↑ | ↓ | ↑ | ↓↓ | ↑ | ↓ | ↑ | ↓ | ↓ | ↓ | ↑ | ↓ | ↑ | ↓ | ↓ | ↑ | ↑ | ↓ | 275 |
| 21 | 64 | M | 14B | 6.1 | 85 | 10 | ↑ | ↑ | ↑ | ↓ | ↑ | ↓ | ↑ | ↓ | ↓ | ↓ | ↑ | ↓ | ↑ | ↓ | ↑ | ↓ | ↑ | ↓ | 282 |
| 22 | 72 | M | 15 | 6 | 80 | 13 | ↓ | ↓ | ↓↓ | ↓ | ↑ | ↓ | ↑ | ↓ | ↑ | ↓ | ↑ | ↓ | ↓ | ↓ | ↑ | ↑ | ↑ | ↓ | 276 |
| 23 | 54 | F | 12 | 7.2 | 85 | 11 | ↑ | ↑ | ↓ | ↓ | ↑ | ↓ | ↑ | ↓ | ↑↑ | ↓ | ↑ | ↓ | ↓↓ | ↓ | ↓ | ↓ | ↑ | ↓ | 261 |
| 24 | 70 | F | 12 | 6.9 | 80 | 15 | ↑ | ↑ | ↓ | ↓↓ | ↓ | ↓ | ↑ | ↓ | ↑ | ↓ | ↑ | ↓↓ | ↓ | ↓ | ↓↓ | ↓ | ↓ | ↓↓ | 249 |
| 25 | 80 | M | 10 | 7.8 | 85 | 29 | ↓↓ | ↓↓ | ↑ | ↑ | ↓↓ | ↓ | ↓ | ↓ | ↓ | ↓ | ↓ | ↓ | ↓↓ | ↓ | ↑ | ↑ | ↓↓ | ↓ | 221 |
| 26 | 74 | M | 15 | 6.8 | 86 | 15 | ↓↓ | ↓↓ | ↓ | ↑↑ | ↓ | ↑↑ | ↑ | ↑↑ | ↑ | ↑↑ | ↓↓ | ↑↑ | ↓ | ↑ | ↓ | ↑↑ | ↓↓ | ↑↑ | 230 |
| 27 | 60 | M | 15 | 5.8 | 90 | 15 | ↓ | ↓ | ↑ | ↓ | ↓ | ↓ | ↑ | ↓ | ↑ | ↓ | ↑ | ↓ | ↓ | ↓ | ↓ | ↑ | ↓ | ↓ | 265 |
| 28 | 66 | M | 10 | 7.8 | 80 | 19 | ↓ | ↓↓ | ↓ | ↓ | ↑ | ↓ | ↑↑ | ↑ | ↑ | ↑ | ↓ | ↑ | ↑ | ↑ | ↓ | ↓ | ↑ | ↑ | 270 |
| 29 | 63 | M | 20 | 8.1 | 85 | 10 | ↑ | ↓ | ↓↓ | ↑ | ↓ | ↑↑ | ↑ | ↑ | ↑ | ↑ | ↓ | ↑ | ↓ | ↑ | ↑ | ↑↑ | ↓ | ↑ | 250 |
| 30 | 62 | M | 10 | 5.7 | 80 | 8 | ↓ | ↓ | ↓↓ | ↓ | ↓ | ↓ | ↑ | ↓ | ↑↑ | ↓ | ↓ | ↓↓ | ↑ | ↓ | ↑ | ↓ | ↑ | ↓↓ | 260 |
| 31 | 68 | M | 10 | 9.6 | 85 | 19 | ↓ | ↓ | ↓↓ | ↓ | ↓ | ↓ | ↑ | ↓ | ↑ | ↓ | ↑ | ↓ | ↓ | ↓ | ↓ | ↓ | ↑ | ↓ | 273 |
| 32 | 67 | M | 15 | 7.1 | 85 | 14 | ↓ | ↓ | ↑ | ↓ | ↓ | ↑ | ↑ | ↑ | ↓ | ↑ | ↑ | ↑ | ↓ | ↓ | ↑ | ↑ | ↓ | ↑ | 256 |
| 33 | 66 | M | 20 | 6.7 | 80 | 20 | ↓ | ↓ | ↑ | ↓ | ↑↑ | ↑ | ↑↑ | ↑↑ | ↑ | ↑↑ | ↑ | ↑↑ | ↓ | ↓ | ↓ | ↑ | ↑↑ | ↑↑ | **311** |
| 34 | 77 | M | 15 | 7.8 | 70 | 19 | ↓ | ↓ | ↑ | ↑ | ↑↑ | ↑↑ | ↑↑ | ↑↑ | ↑ | ↑↑ | ↑ | ↑↑ | ↓ | ↑↑ | ↓ | ↑ | ↑↑ | ↑↑ | **307** |
| 35 | 71 | M | 20 | 8.7 | 85 | 10 | ↓ | ↓↓ | ↓ | ↑↑ | ↑ | ↑↑ | ↑ | ↑↑ | ↑ | ↑↑ | ↓ | ↑ | ↓↓ | ↑ | ↑ | ↓ | ↓ | ↑↑ | 247 |
| 36 | 71 | F | 20 | 7.2 | 84 | 20 | ↓↓ | ↓↓ | ↓ | ↑↑ | ↑ | ↑↑ | ↑ | ↑↑ | ↑ | ↑↑ | ↓ | ↑↑ | ↑ | ↑↑ | ↓↓ | ↓ | ↑ | ↑↑ | 264 |
| 37 | 72 | M | 15 | 6.2 | 85 | 8 | ↓ | ↓ | ↑ | ↓ | ↓ | ↓ | ↑ | ↓ | ↑ | ↓ | ↑ | ↓ | ↑↑ | ↓ | ↓ | ↑ | ↑ | ↓ | 285 |
| 38 | 58 | F | 10 | 7 | 80 | 13 | ↑ | ↑ | ↓ | ↓ | ↓ | ↑ | ↓ | ↓ | ↑↑ | ↑ | ↓ | ↓ | ↓ | ↓ | ↑ | ↓ | ↓ | ↓ | 241 |
| 39 | 68 | M | 15 | 7.5 | 76 | 30 | ↓↓ | ↓↓ | ↓ | ↑ | ↓ | ↑ | ↑↑ | ↑↑ | ↓ | ↑↑ | ↑ | ↑ | ↑ | ↑ | ↓ | ↑↑ | ↑ | ↑ | 271 |
| 40 | 68 | F | 10 | 6.5 | 85 | 18 | ↓ | ↓ | ↑ | ↑↑ | ↑ | ↑↑ | ↑ | ↑↑ | ↑↑ | ↑↑ | ↓↓ | ↑ | ↓ | ↑↑ | ↓ | ↓ | ↑ | ↑↑ | 259 |
| 41 | 64 | F | 10 | 6.9 | 85 | 25 | ↑ | ↑ | ↑↑ | ↑↑ | ↓ | ↑ | ↑ | ↑ | ↑ | ↓ | ↑ | ↑ | ↑↑ | ↑ | ↓↓ | ↓ | ↑ | ↑ | 274 |
| 42 | 70 | M | 10 | 6.7 | 83 | 20 | ↓↓ | ↓↓ | ↓ | ↓ | ↓↓ | ↑ | ↑ | ↑↑ | ↓ | ↑↑ | ↑ | ↑↑ | ↑ | ↑↑ | ↓ | ↑ | ↓ | ↑↑ | 259 |
| 43 | 71 | F | 10 | 7.4 | 80 | 35 | ↓ | ↓ | ↓ | ↓ | ↓ | ↓ | ↓ | ↓ | ↓ | ↓ | ↓ | ↓ | ↓ | ↓ | ↓ | ↑ | ↓ | ↓ | 215 |
| 44 | 63 | F | 15 | 6.7 | 80 | 11 | ↓ | ↑ | ↓ | ↑ | ↓ | ↑ | ↑ | ↑ | ↑ | ↑ | ↑ | ↑ | ↑ | ↓ | ↓↓ | ↓ | ↑ | ↑ | 259 |
| 45 | 79 | F | 15 | 5.9 | 85 | 19 | ↓ | ↓ | ↑ | ↓ | ↑ | ↓ | ↑↑ | ↑ | ↑ | ↓ | ↑ | ↓ | ↓↓ | ↓ | ↓ | ↓ | ↑ | ↓ | 288 |
| 46 | 77 | F | 10 | 6.4 | 80 | 8 | ↓ | ↓ | ↓ | ↓ | ↓ | ↓ | ↑ | ↓ | ↑ | ↓ | ↑ | ↓ | ↓↓ | ↓ | ↓ | ↑ | ↓ | ↓ | 241 |
| 47 | 62 | F | 15 | 7 | 85 | 17 | ↓ | ↑ | ↓ | ↓ | ↓ | ↑ | ↑ | ↓ | ↑ | ↓ | ↓ | ↓ | ↑ | ↓ | ↓ | ↓ | ↑ | ↓ | 255 |
| 48 | 71 | F | 10 | 6.9 | 85 | 24 | ↓ | ↓ | ↓ | ↑ | ↓ | ↑ | ↑ | ↑ | ↓ | ↓ | ↑ | ↓ | ↓↓ | ↓ | ↑ | ↑↑ | ↑ | ↓ | 263 |
| 49 | 70 | F | 15 | 6.9 | 85 | 13 | ↓ | ↓ | ↓ | ↓ | ↓ | ↓ | ↓ | ↓ | ↑↑ | ↓ | ↓ | ↓ | ↓ | ↓ | ↓ | ↓ | ↓ | ↓ | 238 |
| 50 | 60 | F | 20 | 8.5 | 80 | 34 | ↑ | ↑ | ↓ | ↓ | ↓↓ | ↓ | ↓ | ↓ | ↓ | ↓ | ↓ | ↓ | ↑ | ↓ | ↓ | ↓ | ↓ | ↓ | 212 |
| 51 | 58 | M | 10 | 6.2 | 80 | 25 | ↓ | ↓ | ↓ | ↓ | ↓ | ↑ | ↑ | ↑ | ↑ | ↑ | ↓ | ↑ | ↑ | ↑ | ↓ | ↓ | ↓ | ↑ | 264 |
| 52 | 53 | F | 20 | 6.2 | 85 | 19 | ↑ | ↑↑ | ↑ | ↑ | ↑ | ↓ | ↑↑ | ↓ | ↑ | ↓ | ↑ | ↓ | ↓ | ↓ | ↑ | ↓ | ↑ | ↓ | 287 |
| 53 | 71 | F | 10 | 6.1 | 83 | 14 | ↓↓ | ↓↓ | ↑ | ↑↑ | ↓↓ | ↑ | ↓ | ↑ | ↓ | ↑↑ | ↑ | ↑↑ | ↓↓ | ↓ | ↓ | ↓ | ↓↓ | ↑↑ | 210 |
| 54 | 67 | F | 12 | 6.6 | 85 | 15 | ↑ | ↑ | ↓ | ↑ | ↑ | ↑ | ↑ | ↑ | ↑ | ↑ | ↑ | ↑ | ↓↓ | ↓ | ↑ | ↑ | ↑ | ↑ | 271 |

Abbreviations: VD: vessel density; SRP: superficial retinal plexus; DRP: deep retinal plexus; CSF: Central Subfield; RNFL: retinal nerve fibre layer; GCL+IPL: ganglion cell and inner plexiform layers; INL: inner nuclear layer; OPL: outer plexiform layer; ONL+IS: outer plexiform layer and inner segment; OS: outer segment; RPE: retinal pigment epithelium; LOR: Low optical reflectivity.

**Supplementary Table 2.** Results for the ETDRS group 35. The ↓↓ (↑↑) correspond to the case when the values of the metrics were lower (higher) when compared to the mean value of the healthy control population minus (plus) two SD. The ↓ (↑) correspond to the value of the metric minus (plus) more than one SD when compared to the mean value of the healthy control population. The ↓ (↑) corresponds to the case when the value is lower (higher) when compared to the mean of the control population. For the full thickness values, the framed values correspond to cases with subclinical macular edema and bold values to central-involved macular edema.

|  |  |  |  |  |  |  |  |  | RNFL | | GCL+IPL | | INL | | OPL | | ONL+IS | | OS | | RPE | | RETINA | | |
| --- | --- | --- | --- | --- | --- | --- | --- | --- | --- | --- | --- | --- | --- | --- | --- | --- | --- | --- | --- | --- | --- | --- | --- | --- | --- |
| Id | Age [y] | Gender | ETDRS Level | HbA1C [%] | Visual Acuity [letters] | Diabetes Duration [y] | VD 3x3 SRP | VD 3x3 DRP | Thickness (CSF) | LOR (CSF) | Thickness (CSF) | LOR (CSF) | Thickness (CSF) | LOR (CSF) | Thickness (CSF) | LOR (CSF) | Thickness (CSF) | LOR (CSF) | Thickness (CSF) | LOR (CSF) | Thickness (CSF) | LOR (CSF) | Thickness (CSF) | LOR (CSF) | Thickness (CSF) [µm] |
| 1 | 67 | M | 35C | 6.9 | 85 | 16 | ↓ | ↓ | ↑ | ↓ | ↑ | ↓ | ↑↑ | ↑ | ↑ | ↓ | ↓ | ↓ | ↑ | ↓ | ↓ | ↑ | ↑ | ↓ | 288 |
| 2 | 63 | M | 35C | 5.3 | 85 | 15 | ↑ | ↓ | ↓ | ↓ | ↑ | ↓ | ↑ | ↓ | ↑ | ↓ | ↓ | ↓ | ↑↑ | ↓ | ↓ | ↑ | ↑ | ↓ | 269 |
| 3 | 68 | M | 35C | 6.8 | 82 | 17 | ↓ | ↓↓ | ↓↓ | ↓ | ↑ | ↑ | ↑↑ | ↑ | ↑ | ↓ | ↑↑ | ↑ | ↑ | ↓ | ↓ | ↓ | ↑ | ↑ | 289 |
| 4 | 66 | M | 35C | 7.8 | 85 | 29 | ↓ | ↓↓ | ↑ | ↑↑ | ↑ | ↑ | ↑ | ↑ | ↑ | ↑ | ↓ | ↑ | ↓ | ↓ | ↓ | ↓ | ↑ | ↑ | 268 |
| 5 | 56 | M | 35C | 8.3 | 83 | 24 | ↓ | ↓↓ | ↑ | ↑↑ | ↓ | ↑↑ | ↓ | ↑↑ | ↓ | ↑↑ | ↑↑ | ↑↑ | ↓↓ | ↑ | ↓ | ↑↑ | ↓ | ↑↑ | 260 |
| 6 | 69 | M | 35C | 8.5 | 80 | 12 | ↓ | ↓ | ↑ | ↓ | ↓ | ↓ | ↑ | ↓ | ↓ | ↓ | ↓ | ↓ | ↓ | ↓ | ↓ | ↓ | ↓ | ↓ | 253 |
| 7 | 69 | M | 35C | 8.4 | 85 | 22 | ↓ | ↓↓ | ↓ | ↓↓ | ↓ | ↓ | ↑ | ↑ | ↑ | ↓ | ↑ | ↑ | ↑ | ↑ | ↓ | ↓ | ↑ | ↑ | 268 |
| 8 | 74 | M | 35C | 6.7 | 80 | 18 | ↓↓ | ↓↓ | ↑ | ↑ | ↓ | ↑↑ | ↑↑ | ↑↑ | ↓ | ↑↑ | ↑↑ | ↑↑ | ↑ | ↑ | ↓ | ↑ | ↑ | ↑↑ | 290 |
| 9 | 65 | M | 35C | 7 | 90 | 22 | ↓ | ↓↓ | ↓ | ↑ | ↑ | ↑↑ | ↑↑ | ↑↑ | ↑ | ↑↑ | ↑↑ | ↑↑ | ↓ | ↑↑ | ↓ | ↑ | ↑↑ | ↑↑ | 293 |
| 10 | 65 | M | 35F | 8 | 85 | 8 | ↑ | ↓ | ↑ | ↑ | ↓↓ | ↓ | ↑ | ↓ | ↑ | ↓ | ↑ | ↓ | ↓ | ↑ | ↓ | ↑ | ↑ | ↓ | 277 |
| 11 | 71 | M | 35C | 6.9 | 75 | 31 | ↓↓ | ↓↓ | ↓ | ↑ | ↑ | ↑ | ↑ | ↑ | ↑ | ↑↑ | ↑ | ↓ | ↓ | ↓ | ↑ | ↓ | ↑ | ↓ | 289 |
| 12 | 61 | M | 35C | 8.6 | 85 | 18 | ↓↓ | ↓ | ↓ | ↓↓ | ↓ | ↓ | ↑↑ | ↓ | ↑ | ↑ | ↓ | ↓ | ↑ | ↑ | ↓ | ↓ | ↓ | ↓ | 257 |
| 13 | 76 | M | 35E | 6.8 | 87 | 20 | ↓↓ | ↓↓ | ↓ | ↓ | ↓ | ↓ | ↑ | ↑ | ↓ | ↑ | ↑↑ | ↑ | ↓ | ↓ | ↓ | ↑ | ↑ | ↑ | 265 |
| 14 | 73 | F | 35E | 6.7 | 85 | 16 | ↓ | ↑ | ↑ | ↑ | ↓ | ↓ | ↓ | ↓ | ↓ | ↓ | ↑ | ↓ | ↑ | ↓ | ↓ | ↓ | ↑ | ↓ | 259 |
| 15 | 65 | M | 35C | 7.1 | 94 | 25 | ↑ | ↑ | ↑ | ↓ | ↑ | ↓ | ↑↑ | ↓ | ↑ | ↓ | ↑ | ↓↓ | ↓ | ↓ | ↓ | ↑ | ↑↑ | ↓↓ | 302 |
| 16 | 71 | M | 35C | 7.5 | 85 | 26 | ↑ | ↑ | ↑ | ↑ | ↑ | ↓ | ↑↑ | ↑↑ | ↑↑ | ↓ | ↓↓ | ↓ | ↑ | ↑ | ↑ | ↑ | ↑ | ↓ | 281 |
| 17 | 70 | M | 35C | 6.5 | 90 | 31 | ↓ | ↓ | ↓ | ↓ | ↑ | ↑ | ↑ | ↑↑ | ↑ | ↑ | ↑↑ | ↑ | ↑↑ | ↑ | ↓ | ↓ | ↑ | ↑ | 287 |
| 18 | 78 | M | 35D | 6.2 | 85 | 15 | ↓↓ | ↓↓ | ↑ | ↑ | ↓ | ↑ | ↑ | ↑↑ | ↑ | ↑ | ↓ | ↑ | ↓ | ↓ | ↑ | ↓ | ↑ | ↑ | 260 |
| 19 | 67 | M | 35C | 8.2 | 80 | 29 | ↓ | ↓ | ↓ | ↓ | ↓ | ↑ | ↑ | ↑ | ↑ | ↑ | ↓ | ↑ | ↓ | ↑ | ↓ | ↓ | ↓ | ↑ | 255 |
| 20 | 68 | M | 35D | 7.1 | 75 | 20 | ↓ | ↓ | ↓↓ | ↓ | ↓ | ↑ | ↑ | ↑ | ↓ | ↓ | ↓ | ↓ | ↓ | ↑ | ↓ | ↓ | ↓ | ↓ | 245 |
| 21 | 61 | M | 35D | 7.2 | 85 | 26 | ↓↓ | ↓↓ | ↓ | ↑ | ↓ | ↑↑ | ↑ | ↑↑ | ↓ | ↑↑ | ↑ | ↑↑ | ↑ | ↑ | ↓ | ↑ | ↓ | ↑↑ | 260 |
| 22 | 69 | M | 35D | 6.8 | 85 | 12 | ↓ | ↓ | ↓↓ | ↑ | ↓ | ↑ | ↓ | ↓ | ↑ | ↑ | ↓ | ↑ | ↓ | ↓ | ↓ | ↓ | ↓ | ↑ | 239 |
| 23 | 68 | M | 35C | 6.6 | 85 | 20 | ↓ | ↓ | ↓ | ↑↑ | ↓ | ↑↑ | ↓ | ↑↑ | ↓ | ↑↑ | ↑ | ↑↑ | ↑↑ | ↑↑ | ↓ | ↑↑ | ↓ | ↑↑ | 257 |
| 24 | 69 | F | 35E | 6.8 | 81 | 20 | ↓ | ↓ | ↑ | ↓ | ↑ | ↑ | ↑ | ↑ | ↑ | ↑ | ↑ | ↑ | ↓↓ | ↓ | ↓ | ↓ | ↑ | ↑ | 272 |
| 25 | 88 | M | 35E | 8.7 | - | 34 | ↓↓ | ↓↓ | ↓↓ | ↑ | ↑ | ↑↑ | ↑↑ | ↑↑ | ↑↑ | ↑ | ↑ | ↑ | ↓↓ | ↓ | ↑ | ↑↑ | ↑ | ↑↑ | 280 |
| 26 | 57 | M | 35C | 7.6 | 85 | 10 | ↓ | ↑ | ↑ | ↑ | ↑↑ | ↑↑ | ↑↑ | ↑↑ | ↑↑ | ↑ | ↑ | ↑↑ | ↓ | ↑ | ↓ | ↑ | ↑↑ | ↑↑ | **325** |
| 27 | 77 | M | 35D | 6.8 | 80 | 27 | ↓ | ↓ | ↓ | ↑ | ↑ | ↑↑ | ↑↑ | ↑↑ | ↓ | ↑↑ | ↑ | ↑↑ | ↓ | ↑ | ↓ | ↑ | ↑ | ↑↑ | 283 |
| 28 | 66 | M | 35C | 6.5 | 83 | 13 | ↓ | ↓↓ | ↑ | ↑ | ↓↓ | ↑ | ↓ | ↓ | ↓ | ↓ | ↑ | ↓ | ↓ | ↑ | ↓ | ↑ | ↓ | ↓ | 256 |
| 29 | 65 | M | 35C | 7.1 | 85 | 20 | ↓↓ | ↓ | ↑ | ↑ | ↑↑ | ↑↑ | ↑↑ | ↑↑ | ↑↑ | ↑ | ↓ | ↑ | ↑ | ↑ | ↓ | ↓ | ↑↑ | ↑ | **320** |
| 30 | 58 | M | 35C | 7.3 | 80 | 20 | ↓ | ↓ | ↓ | ↓ | ↓↓ | ↑ | ↓ | ↑ | ↓ | ↓ | ↓ | ↑ | ↑ | ↑ | ↓ | ↓ | ↓ | ↑ | 241 |
| 31 | 72 | M | 35C | 6.3 | 80 | 16 | ↓↓ | ↓↓ | ↓ | ↓ | ↓ | ↑↑ | ↑ | ↑↑ | ↓ | ↑↑ | ↑ | ↑ | ↑ | ↑ | ↓ | ↑↑ | ↑ | ↑↑ | 271 |
| 32 | 69 | M | 35C | 7.8 | 80 | 9 | ↓ | ↓ | ↓↓ | ↓ | ↑ | ↑ | ↑ | ↓ | ↓ | ↓ | ↑ | ↓ | ↓ | ↓ | ↑ | ↓ | ↑ | ↓ | 262 |
| 33 | 72 | M | 35C | 7.3 | 75 | 7 | ↓↓ | ↓↓ | ↓ | ↑ | ↓ | ↑↑ | ↑ | ↑↑ | ↓ | ↑ | ↑ | ↑↑ | ↑↑ | ↑ | ↓ | ↑ | ↑ | ↑↑ | 265 |
| 34 | 76 | M | 35C | 8.9 | 80 | 16 | ↓↓ | ↓↓ | ↓ | ↑ | ↓ | ↑↑ | ↑ | ↑↑ | ↑↑ | ↑↑ | ↓↓ | ↑ | ↓ | ↓ | ↓ | ↑ | ↓ | ↑ | 240 |
| 35 | 76 | M | 35C | 8 | 70 | 25 | ↓ | ↓ | ↓ | ↑ | ↑ | ↑ | ↑ | ↑ | ↑ | ↑↑ | ↑ | ↑ | ↓ | ↑ | ↑ | ↓ | ↑ | ↑ | 274 |
| 36 | 64 | F | 35C | 7.4 | 80 | 10 | ↑ | ↑ | ↑ | ↓ | ↑ | ↑ | ↑ | ↑ | ↓ | ↓ | ↑ | ↑ | ↑ | ↑ | ↓ | ↓ | ↑ | ↑ | 273 |
| 37 | 77 | M | 35C | 6.8 | 85 | 29 | ↓ | ↑ | ↑ | ↑↑ | ↑↑ | ↑↑ | ↑↑ | ↑↑ | ↑↑ | ↑↑ | ↑↑ | ↑↑ | ↓↓ | ↑ | ↓ | ↑↑ | ↑↑ | ↑↑ | **348** |
| 38 | 69 | F | 35C | 7.5 | 78 | 12 | ↓ | ↓ | ↓ | ↑ | ↓ | ↑↑ | ↓ | ↑↑ | ↑ | ↑↑ | ↓ | ↑ | ↑↑ | ↑↑ | ↓↓ | ↑↑ | ↓ | ↑ | 228 |
| 39 | 63 | M | 35C | 7.3 | 85 | 15 | ↓ | ↓ | ↓ | ↓ | ↑ | ↓ | ↑ | ↑ | ↑ | ↑ | ↓ | ↑ | ↓ | ↓ | ↑ | ↓ | ↑ | ↑ | 266 |
| 40 | 73 | M | 35C | 7.6 | 80 | 20 | ↑ | ↑ | ↓ | ↓ | ↑↑ | ↓ | ↑ | ↓ | ↑ | ↓ | ↑ | ↓ | ↓ | ↓ | ↓ | ↓ | ↑↑ | ↓ | 301 |
| 41 | 68 | F | 35C | 7.5 | 85 | 20 | ↓ | ↓↓ | ↓ | ↑↑ | ↑ | ↑↑ | ↑ | ↑ | ↑↑ | ↑ | ↓↓ | ↑ | ↓ | ↓ | ↓ | ↑↑ | ↓ | ↑ | 244 |
| 42 | 57 | F | 35D | 7.7 | 85 | 1 | ↓ | ↓ | ↑ | ↑ | ↓ | ↓ | ↑ | ↓ | ↑ | ↓ | ↑ | ↓ | ↑↑ | ↓ | ↓↓ | ↑ | ↑ | ↓ | 254 |
| 43 | 56 | F | 35F | 6.3 | 85 | 12 | ↓ | ↓ | ↓ | ↓ | ↓ | ↑ | ↑ | ↑ | ↑ | ↑ | ↑↑ | ↑ | ↑↑ | ↓ | ↓ | ↓ | ↑ | ↑ | 264 |
| 44 | 74 | M | 35C | 7.8 | - | 23 | ↓↓ | ↓↓ | ↓↓ | ↑↑ | ↓↓ | ↑↑ | ↓ | ↑↑ | ↓ | ↑↑ | ↓ | ↑↑ | ↓ | ↑ | ↓↓ | ↑ | ↓↓ | ↑↑ | 227 |
| 45 | 77 | M | 35C | 6.8 | 80 | 24 | ↓↓ | ↓↓ | ↓ | ↓ | ↑ | ↑ | ↑ | ↑ | ↑ | ↑ | ↓ | ↓ | ↓ | ↑↑ | ↑ | ↑ | ↓ | ↓ | 261 |
| 46 | 67 | M | 35C | 4.2 | 80 | 3 | ↓ | ↓ | ↑ | ↓ | ↑ | ↓ | ↑↑ | ↑↑ | ↓ | ↓ | ↑ | ↑ | ↓ | ↓ | ↓ | ↓ | ↑↑ | ↑ | 301 |
| 47 | 76 | M | 35C | 9 | 70 | 35 | ↓ | ↓ | ↓ | ↓ | ↓ | ↓ | ↓ | ↓ | ↑ | ↓ | ↓↓ | ↓ | ↓ | ↓ | ↓ | ↓ | ↓ | ↓ | 238 |
| 48 | 68 | F | 35C | 7.7 | 85 | 9 | ↓ | ↓ | ↑ | ↓ | ↓ | ↓ | ↓ | ↓ | ↑ | ↓ | ↑ | ↓ | ↓ | ↓ | ↓ | ↑ | ↓ | ↓ | 246 |
| 49 | 66 | M | 35C | 7.6 | 85 | 20 | ↓ | ↑ | ↓ | ↑ | ↑ | ↑↑ | ↑↑ | ↑↑ | ↑ | ↑ | ↓ | ↑ | ↓ | ↓ | ↓ | ↓ | ↑ | ↑↑ | 276 |
| 50 | 60 | M | 35C | 8.5 | 85 | 19 | ↓↓ | ↓ | ↓ | ↑ | ↓↓ | ↓ | ↑ | ↑ | ↑ | ↑↑ | ↑ | ↑ | ↓ | ↓ | ↓ | ↑ | ↓ | ↑ | 255 |
| 51 | 74 | F | 35C | 7 | 80 | 10 | ↓ | ↓↓ | ↓ | ↓ | ↑ | ↓ | ↑ | ↑ | ↑↑ | ↑↑ | ↓ | ↓ | ↓↓ | ↑↑ | ↑ | ↑↑ | ↑ | ↑ | 258 |
| 52 | 70 | M | 35C | 9.5 | 70 | 17 | ↓ | ↓ | ↓ | ↑↑ | ↓ | ↑↑ | ↑ | ↑↑ | ↑ | ↑↑ | ↑↑ | ↑ | ↑ | ↑↑ | ↓ | ↑ | ↑ | ↑↑ | 283 |
| 53 | 66 | M | 35D | 8.1 | 84 | 16 | ↓ | ↓↓ | ↓ | ↑ | ↑ | ↑ | ↑ | ↑↑ | ↑↑ | ↑↑ | ↓↓ | ↑ | ↑↑ | ↑↑ | ↑ | ↑ | ↑ | ↑ | 264 |
| 54 | 68 | M | 35D | 7.2 | 85 | 25 | ↓ | ↓↓ | ↓ | ↓ | ↑↑ | ↑ | ↑ | ↑ | ↑↑ | ↓ | ↓↓ | ↓ | ↓ | ↓ | ↑ | ↑ | ↑↑ | ↑ | **366** |

Abbreviations: VD: vessel density; SRP: superficial retinal plexus; DRP: deep retinal plexus; CSF: Central Subfield; RNFL: retinal nerve fibre layer; GCL+IPL: ganglion cell and inner plexiform layers; INL: inner nuclear layer; OPL: outer plexiform layer; ONL+IS: outer plexiform layer and inner segment; OS: outer segment; RPE: retinal pigment epithelium; LOR: Low optical reflectivity.

**Supplementary Table 3.** Results for the ETDRS group 43-47. The ↓↓ (↑↑) correspond to the case when the values of the metrics were lower (higher) when compared to the mean value of the healthy control population minus (plus) two SD. The ↓ (↑) correspond to the value of the metric minus (plus) more than one SD when compared to the mean value of the healthy control population. The ↓ (↑) corresponds to the case when the value is lower (higher) when compared to the mean of the control population. For the full thickness values, the framed values correspond to cases with subclinical macular edema and bold values to central-involved macular edema.

|  |  |  |  |  |  |  |  |  | RNFL | | GCL+IPL | | INL | | OPL | | ONL+IS | | OS | | RPE | | RETINA | | |
| --- | --- | --- | --- | --- | --- | --- | --- | --- | --- | --- | --- | --- | --- | --- | --- | --- | --- | --- | --- | --- | --- | --- | --- | --- | --- |
| Id | Age [y] | Gender | ETDRS Level | HbA1C [%] | Visual Acuity [letters] | Diabetes Duration [y] | VD 3x3 SRP | VD 3x3 DRP | Thickness (CSF) | LOR (CSF) | Thickness (CSF) | LOR (CSF) | Thickness (CSF) | LOR (CSF) | Thickness (CSF) | LOR (CSF) | Thickness (CSF) | LOR (CSF) | Thickness (CSF) | LOR (CSF) | Thickness (CSF) | LOR (CSF) | Thickness (CSF) | LOR (CSF) | Thickness (CSF) [µm] |
| 1 | 67 | F | 43A | 6.6 | 82 | 12 | ↓ | ↓ | ↓ | ↑ | ↓ | ↑↑ | ↓ | ↑ | ↓ | ↑ | ↑ | ↑ | ↑ | ↑ | ↑ | ↑ | ↓ | ↑ | 223 |
| 2 | 73 | M | 43A | 7 | 75 | 20 | ↓↓ | ↓↓ | ↓ | ↓ | ↑ | ↓ | ↑ | ↓ | ↑ | ↓ | ↑ | ↓ | ↓ | ↓ | ↓ | ↓ | ↑ | ↓ | 273 |
| 3 | 68 | M | 43A | 9.7 | 85 | 22 | ↓ | ↓ | ↓ | ↓ | ↑ | ↑ | ↑↑ | ↑↑ | ↑ | ↑ | ↓ | ↑ | ↓ | ↓ | ↓ | ↑ | ↑ | ↑ | 265 |
| 4 | 67 | M | 43A | 7 | 82 | 22 | ↓ | ↓↓ | ↓ | ↓ | ↓ | ↑↑ | ↑ | ↑ | ↑↑ | ↑↑ | ↓↓ | ↓ | ↑ | ↑↑ | ↑ | ↑↑ | ↓ | ↑ | 248 |
| 5 | 60 | M | 47A | 6.6 | - | 10 | ↓ | ↓ | ↑ | ↓ | ↑ | ↓ | ↑ | ↓ | ↑ | ↓ | ↑↑ | ↑ | ↑ | ↑ | ↓ | ↑ | ↑↑ | ↓ | **313** |
| 6 | 56 | M | 43B | 7.1 | 85 | 17 | ↑ | ↓ | ↓ | ↓ | ↑ | ↑ | ↑ | ↑ | ↑ | ↑ | ↓ | ↓ | ↑ | ↓ | ↓ | ↑ | ↓ | ↓ | 261 |
| 7 | 74 | F | 43A | 6.4 | 80 | 8 | ↓ | ↓ | ↓ | ↓ | ↑ | ↑ | ↑ | ↓ | ↑ | ↓ | ↑ | ↓ | ↑ | ↓ | ↑ | ↑ | ↑ | ↓ | 276 |
| 8 | 83 | F | 43A | 8.4 | 80 | 28 | ↓↓ | ↓ | ↑ | ↑ | ↓ | ↑ | ↑ | ↑ | ↑ | ↓ | ↓ | ↑ | ↓ | ↓ | ↓ | ↓ | ↓ | ↑ | 251 |
| 9 | 68 | M | 43A | 6.8 | 80 | 16 | ↓↓ | ↓ | ↑ | ↑ | ↓ | ↑ | ↑ | ↑ | ↑ | ↓ | ↑ | ↑ | ↓↓ | ↑ | ↑ | ↑↑ | ↑ | ↑ | 269 |
| 10 | 68 | F | 43A | 8.8 | 75 | 21 | ↓↓ | ↓↓ | ↑ | ↑↑ | ↓ | ↑ | ↓ | ↑ | ↑ | ↑ | ↓ | ↑ | ↓↓ | ↓ | ↓ | ↓ | ↓ | ↑ | 232 |
| 11 | 54 | M | 43A | 7 | 85 | 6 | ↑ | ↑ | ↓ | ↓ | ↑ | ↓ | ↑ | ↓ | ↑ | ↓ | ↑ | ↓ | ↑ | ↓ | ↓ | ↓ | ↑ | ↓ | 294 |
| 12 | 52 | M | 47A | 9.8 | 87 | 15 | ↓ | ↓ | ↓ | ↑ | ↑ | ↑↑ | ↑ | ↑↑ | ↓ | ↑↑ | ↓ | ↑↑ | ↓ | ↑↑ | ↑ | ↑↑ | ↓ | ↑↑ | 252 |
| 13 | 67 | M | 43A | 7.4 | 80 | 15 | ↓ | ↓ | ↓ | ↓ | ↑ | ↑ | ↑↑ | ↑↑ | ↑ | ↑ | ↑ | ↑ | ↓ | ↑ | ↑ | ↓ | ↑↑ | ↑ | 300 |
| 14 | 70 | M | 43A | 9.9 | 55 | 19 | ↓ | ↓ | ↓ | ↑ | ↑ | ↑↑ | ↑↑ | ↑↑ | ↑ | ↑ | ↑↑ | ↑ | ↑ | ↓ | ↓ | ↓ | ↑↑ | ↑ | **308** |
| 15 | 67 | M | 43A | 7.9 | 82 | 27 | ↓ | ↓↓ | ↓ | ↑↑ | ↑ | ↑↑ | ↑ | ↑↑ | ↑ | ↑↑ | ↑ | ↑↑ | ↓ | ↑↑ | ↓ | ↑ | ↑ | ↑↑ | 280 |
| 16 | 75 | M | 47D | 8.1 | 80 | 27 | ↓↓ | ↓ | ↓↓ | ↓ | ↑ | ↑ | ↑↑ | ↑ | ↑ | ↑ | ↓ | ↑ | ↓↓ | ↓ | ↑↑ | ↓ | ↑ | ↑ | 260 |
| 17 | 64 | M | 43A | 5.7 | 85 | 24 | ↓ | ↓↓ | ↓↓ | ↓ | ↓↓ | ↓ | ↑ | ↓ | ↑ | ↓ | ↑ | ↓ | ↓ | ↓ | ↑ | ↓ | ↓ | ↓ | 249 |
| 18 | 65 | M | 43A | 7.1 | 85 | 23 | ↓ | ↑ | ↑ | ↓ | ↑↑ | ↓ | ↑↑ | ↑↑ | ↑↑ | ↓ | ↓ | ↓ | ↓ | ↑ | ↑ | ↓ | ↑↑ | ↓ | **315** |
| 19 | 68 | M | 43A | 8.7 | 85 | 17 | ↓↓ | ↓↓ | ↓ | ↓ | ↓ | ↓ | ↑ | ↑ | ↑ | ↓ | ↑ | ↓ | ↓ | ↓ | ↑ | ↓ | ↓ | ↓ | 255 |
| 20 | 70 | M | 43A | 7.1 | 80 | 19 | ↓↓ | ↓ | ↓ | ↓ | ↓ | ↓ | ↑↑ | ↑ | ↑ | ↓ | ↑↑ | ↓ | ↑ | ↓ | ↓ | ↑↑ | ↑↑ | ↓ | 297 |
| 21 | 77 | M | 43A | 6.8 | 80 | 34 | ↓↓ | ↓↓ | ↓↓ | ↓ | ↓ | ↑↑ | ↑↑ | ↑↑ | ↑ | ↑ | ↑↑ | ↑ | ↓↓ | ↓ | ↑ | ↑ | ↑↑ | ↑↑ | 299 |
| 22 | 76 | F | 43A | 8.4 | 80 | 30 | ↓ | ↓ | ↓ | ↓ | ↓ | ↑ | ↑ | ↓ | ↑ | ↑ | ↑ | ↓ | ↓ | ↓ | ↓ | ↑↑ | ↓ | ↓ | 243 |
| 23 | 64 | M | 47A | 11.8 | 85 | 18 | ↓↓ | ↓↓ | ↑ | ↑↑ | ↓ | ↑↑ | ↑ | ↑↑ | ↓ | ↑↑ | ↓ | ↑↑ | ↓ | ↑↑ | ↓ | ↑↑ | ↓ | ↑↑ | 243 |
| 24 | 83 | F | 43A | 6.9 | 85 | 21 | ↓ | ↓ | ↓ | ↓ | ↑ | ↑ | ↑↑ | ↑ | ↑↑ | ↓ | ↓ | ↓ | ↓↓ | ↓ | ↑ | ↓ | ↑ | ↓ | 261 |
| 25 | 69 | M | 43A | 7.3 | 75 | 23 | ↓↓ | ↓↓ | ↑ | ↑↑ | ↓ | ↑↑ | ↑↑ | ↑↑ | ↑ | ↑↑ | ↑↑ | ↑↑ | ↓ | ↑↑ | ↑ | ↑↑ | ↑ | ↑↑ | 287 |
| 26 | 58 | F | 43A | 11.8 | 85 | 31 | ↓↓ | ↓↓ | ↓ | ↑ | ↑ | ↑↑ | ↑ | ↑↑ | ↓ | ↑ | ↑ | ↑↑ | ↓↓ | ↑ | ↓ | ↑ | ↑ | ↑↑ | 257 |
| 27 | 72 | F | 47A | 8.2 | 85 | 20 | ↓↓ | ↓↓ | ↓ | ↑ | ↓ | ↑↑ | ↑ | ↑↑ | ↑ | ↑↑ | ↑ | ↑↑ | ↓↓ | ↑ | ↑ | ↑↑ | ↓ | ↑↑ | 257 |
| 28 | 68 | M | 43A | 7.4 | 75 | 17 | ↓↓ | ↓ | ↓ | ↑ | ↑ | ↑ | ↑ | ↑↑ | ↓ | ↑ | ↑ | ↑ | ↓ | ↑ | ↓ | ↑ | ↑ | ↑ | 267 |
| 29 | 71 | M | 43A | 10.6 | 85 | 19 | ↓↓ | ↓↓ | ↑ | ↓ | ↓ | ↓ | ↑ | ↑ | ↑↑ | ↑ | ↓ | ↓ | ↓ | ↓ | ↑ | ↑ | ↑ | ↓ | 271 |
| 30 | 59 | M | 47A | 8.2 | 90 | 16 | ↓ | ↓ | ↑ | ↑ | ↓ | ↑ | ↑ | ↑ | ↑ | ↑↑ | ↑ | ↑ | ↓ | ↑ | ↑ | ↓ | ↑ | ↑ | 271 |
| 31 | 74 | F | 43A | 7.3 | 80 | 28 | ↓↓ | ↓ | ↑ | ↑↑ | ↑ | ↑↑ | ↑↑ | ↑↑ | ↑ | ↑↑ | ↓ | ↑↑ | ↓ | ↑↑ | ↓ | ↑↑ | ↑ | ↑↑ | 273 |
| 32 | 54 | F | 43B | 7.4 | 85 | 14 | ↑ | ↑ | ↓ | ↑ | ↓ | ↓ | ↑ | ↓ | ↓ | ↓ | ↑ | ↓ | ↑ | ↓ | ↓↓ | ↑ | ↓ | ↓ | 240 |
| 33 | 59 | F | 47C | 10.4 | 80 | 11 | ↓↓ | ↓ | ↓ | ↑ | ↑ | ↑ | ↑↑ | ↑↑ | ↑↑ | ↑ | ↑ | ↑ | ↓↓ | ↑↑ | ↑ | ↑↑ | ↑↑ | ↑ | **314** |
| 34 | 80 | F | 43A | 6.6 | 75 | 24 | ↓↓ | ↓↓ | ↑ | ↑ | ↓↓ | ↓ | ↓ | ↓ | ↓ | ↑ | ↑ | ↓ | ↓ | ↓ | ↓ | ↑↑ | ↓ | ↓ | 226 |

Abbreviations: VD: vessel density; SRP: superficial retinal plexus; DRP: deep retinal plexus; CSF: Central Subfield; RNFL: retinal nerve fibre layer; GCL+IPL: ganglion cell and inner plexiform layer; INL: inner nuclear layer; OPL: outer plexiform layer; ONL+IS: outer plexiform layer and inner segment; OS: outer segment; RPE: retinal pigment epithelium; LOR: Low optical reflectivity.
